# Supplementary material for: High-throughput phenotypic screen and transcriptional analysis identify new compounds and targets for macrophage reprogramming
Source: PubMed Central journal article supplement (PMC7858590; doi:10.1038/s41467-021-21066-x), 2021-02-03
Supplement: 41467_2021_21066_MOESM1_ESM.pdf [file 41467_2021_21066_MOESM1_ESM.pdf]

## SUPPLEMENTARY INFORMATION

### **High-throughput phenotypic screen and transcriptional analysis identify new compounds and targets for macrophage reprogramming**

Guangan Hu<sup>1\*</sup>, Yang Su<sup>1</sup>, Byong Ha Kang<sup>2</sup>, Zhongqi Fan<sup>1</sup>, Ting Dong<sup>1</sup>, Douglas R. Brown<sup>1</sup>, Jaime Cheah<sup>1</sup>, Karl Dane Wittrup<sup>2</sup> and Jianzhu Chen<sup>1\*</sup>

<sup>1</sup>Koch Institute for Integrative Cancer Research and Department of Biology, Massachusetts Institute of Technology, 77 Massachusetts Avenue, Cambridge, MA 02139, USA

<sup>2</sup>Koch Institute for Integrative Cancer Research and Department of Biological Engineering, Massachusetts Institute of Technology, 77 Massachusetts Avenue, Cambridge, MA 02139, USA

This file includes:

Supplementary Figures 1-13

Supplementary Table 1

Supplementary Table 2

Supplementary Table 3

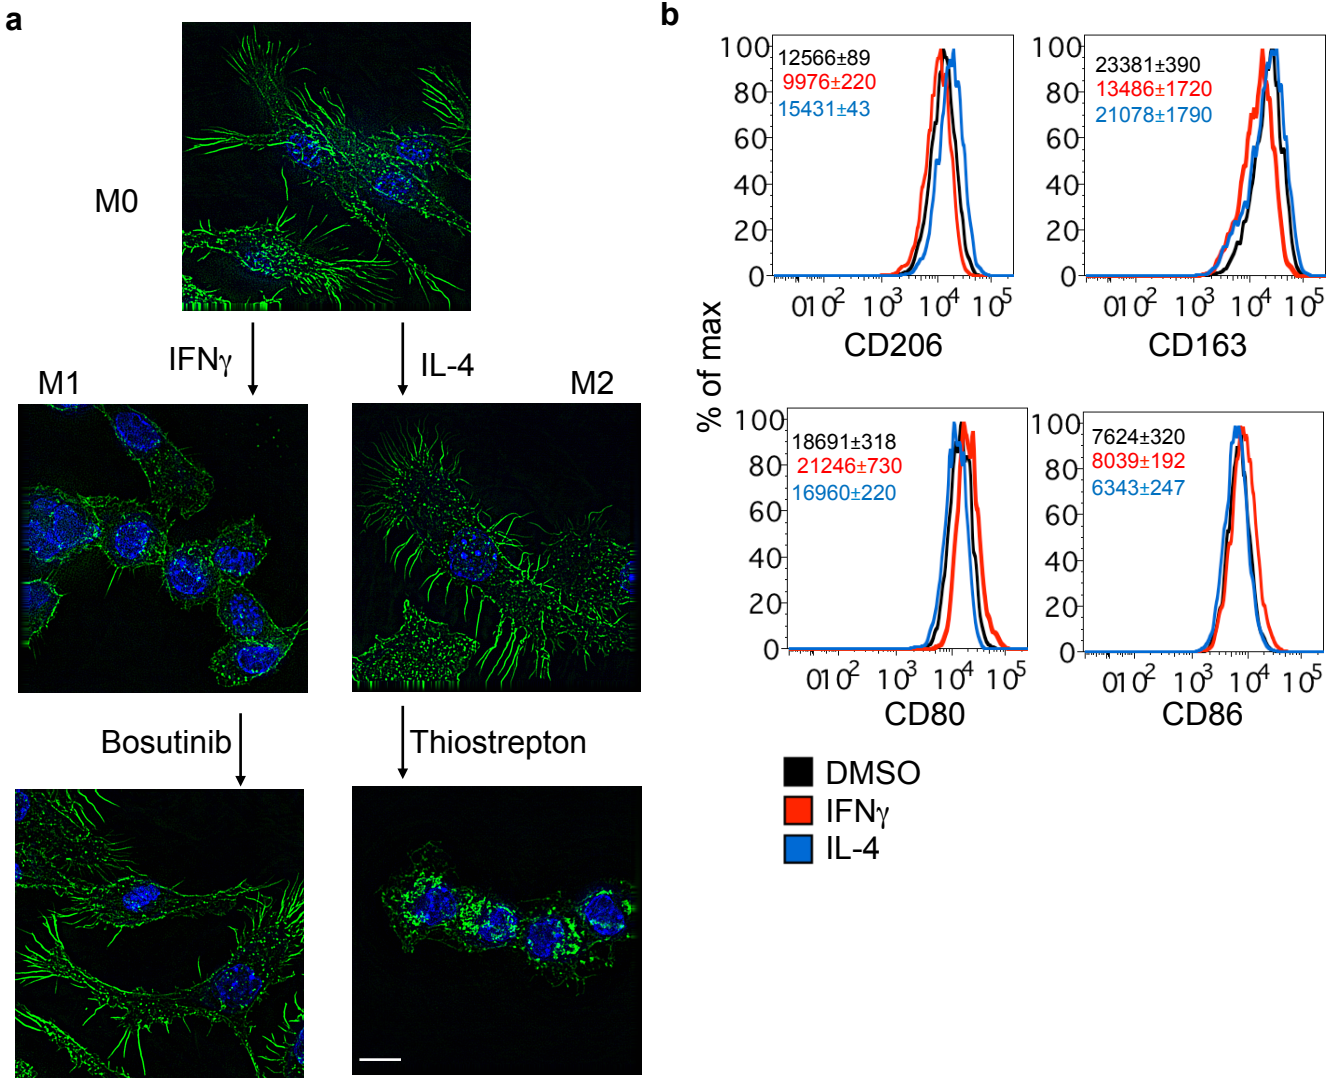

Supplementary Fig. 1. Morphology and phenotypes of activated macrophages. **a**, F-actin staining of M1- and M2-like macrophages. hMDMs were induced to become M0 by M-CSF. The resulting macrophages were polarized to M1 by IFN $\gamma$  or M2 by IL-4. Then, M1 macrophages were treated with M2-activating compound bosutinib (1  $\mu$ M) for 24 hrs, and M2 macrophages were treated with M1-activating compound thiostrepton (2.5  $\mu$ M) for 24 hrs. F-actin was stained by propidium iodide and images were acquired by fluorescent microscopy with 60x objective. Blue is DAPI staining of cell nuclei. Representative data were shown from two independent experiments. Scale bar: 20  $\mu$ m. **b**, CD163, CD206, CD80 and CD86 expression by hMDM treated with DMSO (black), or IFN $\gamma$  (red) or IL-4 (blue) quantified by flow cytometry. Shown are the representative staining profiles from three independent experiments. The numbers show mean fluorescent intensity (MFI)  $\pm$  standard error of the mean (SEM) for n=3 samples per group.

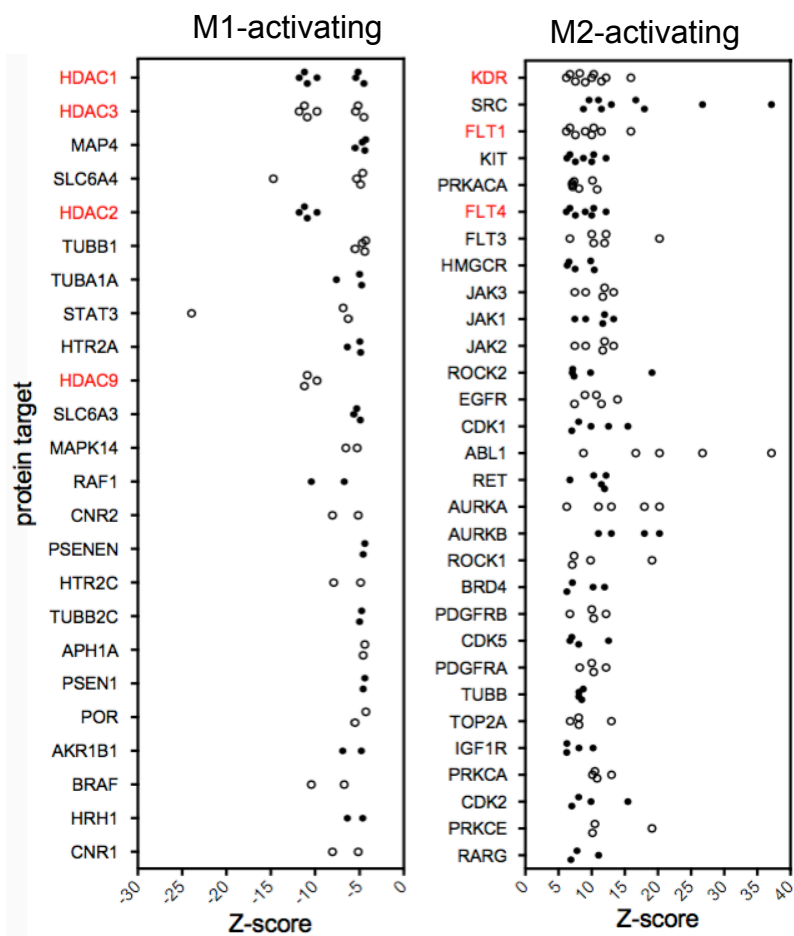

Supplementary Fig. 2. The top list of proteins that are targeted by M1-activating and M2-activating compounds. Histone deacetylases and VEGF receptors are highlighted by color. Each dot represents one compound in the compound library.

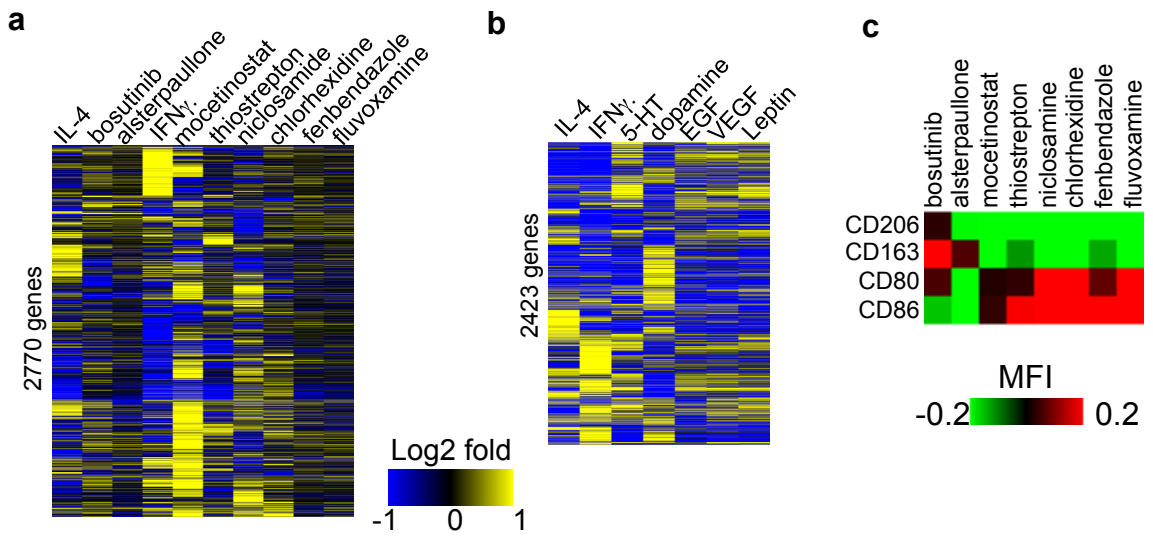

Supplementary Fig. 3. Comparison of the differentially expressed genes induced by selected compounds (**a**), ligands for novel pathways (**b**), and controls (IL-4 and IFN $\gamma$ ). **c**, Changes of the selected M1 markers (CD80 and CD86) and M2 markers (CD206 and CD163) at protein level induced by compound as assayed by flow cytometry. Shown are the changes of the relative mean fluorescence intensity (MFI) to controls. 0.2 refers to 20% increase in MFI.

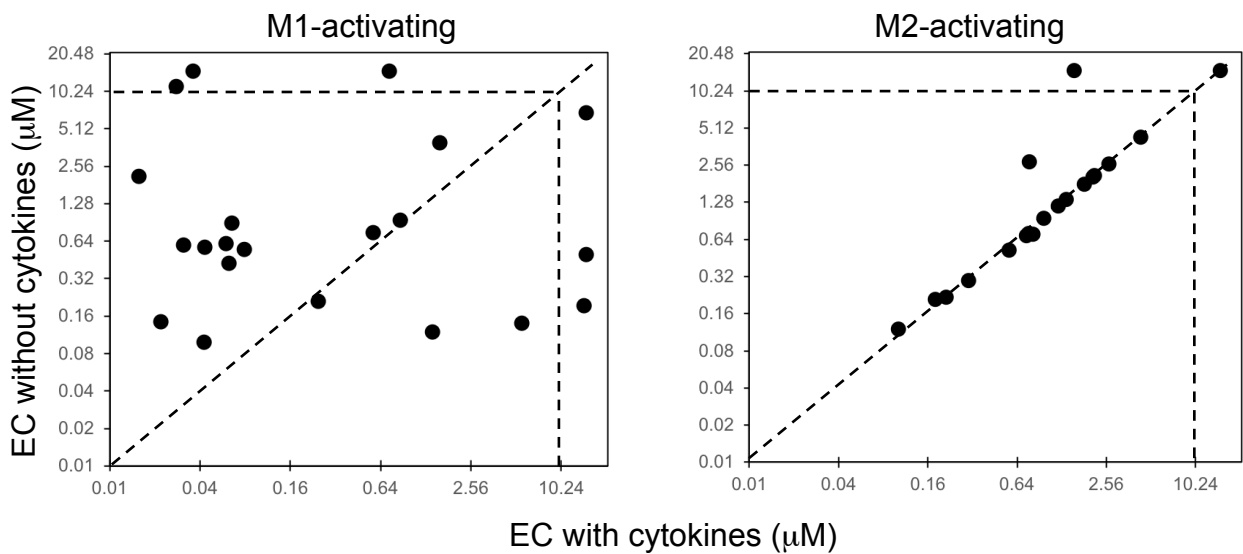

Supplementary Fig. 4. Comparison of EC of 21 M1-activating and 19 M2-activating compounds in the presence or absence of the polarizing cytokines. hMDMs were differentiated into either M2 by IL-4 plus IL-13 for the dosage assays of M1-activating compounds, or M1 by IFN $\gamma$  plus TNF $\alpha$  for the dosage assays of M2-activating compounds. The effective concentrations were calculated by the Michaelis-Menten equation and plotted. Data were summarized from 2 independent experiments.

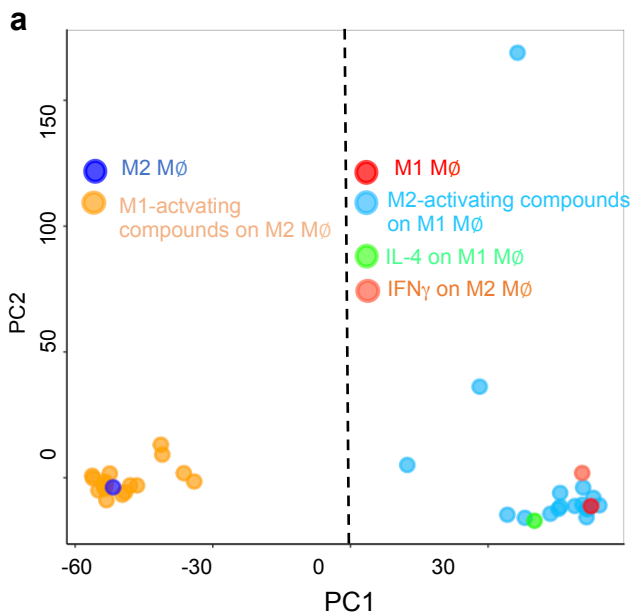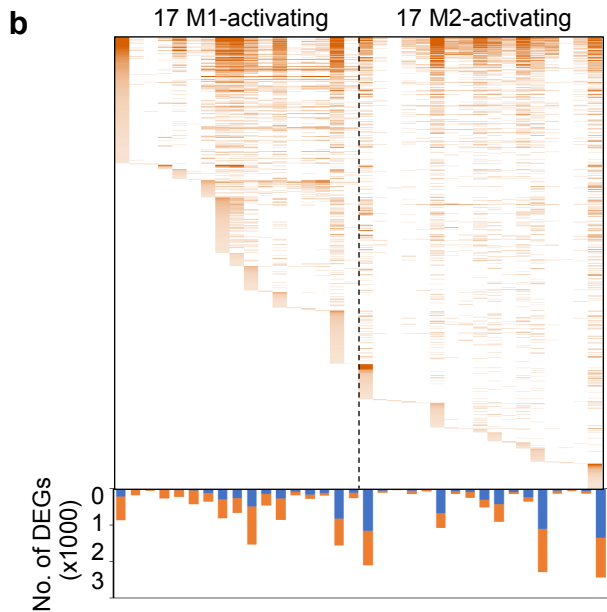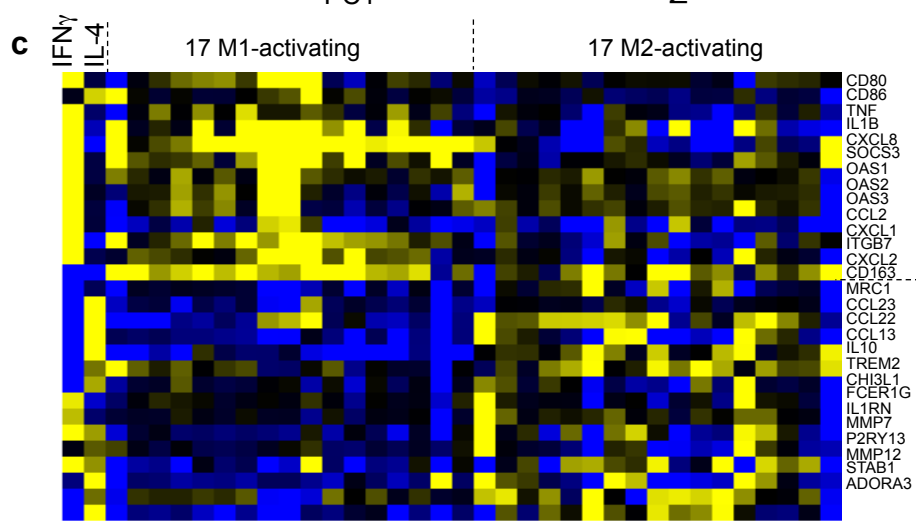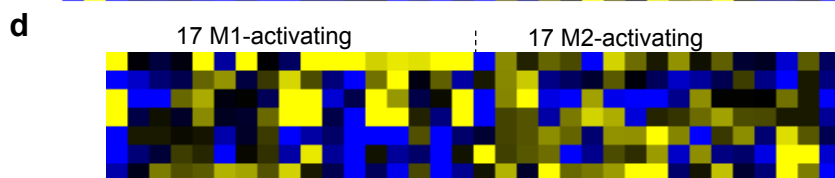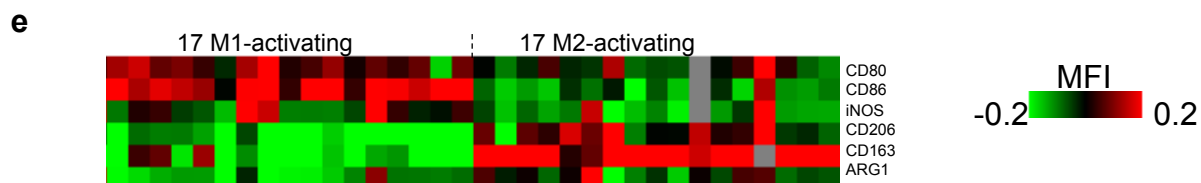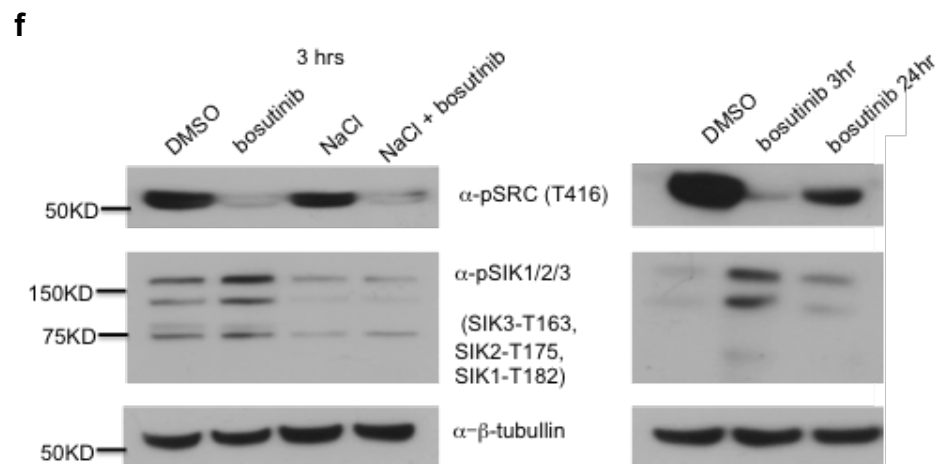

Supplementary Fig. 5. Reprogramming of differentiated macrophages by selected compounds. **a**, Principal component analysis of global transcriptional responses of hMDMs to 17 M1-activating and 17 M2-activating compounds. The samples are the same as those in Figure 4a. **b**, Functional enrichment analysis of DEGs induced by each compound. Shown is the assembled heatmap and number of up-regulated (orange) and down-regulated (blue) DEGs (bottom panel). **c**, Comparison of relative transcript levels of the selected M1 and M2 genes following compound treatment based on RNA-seq. **d**, Comparison of the transcript levels of the selected M1 and M2 genes following compound treatment as measured by quantitative PCR. **e**, Comparison of the protein levels of the selected M1 and M2 markers following compound treatment as measured by flow cytometry. Shown are the relative MFI change to controls. 0.2 refers to 20% increase in MFI. The order of M1-activating and M2-activating compounds in b-e is the same as in Figure 4a. **f**, bosutinib regulates the phosphorylation of SRC and salt-induced kinases. THP1 cells were treated with DMSO (control), bosutinib (1  $\mu$ M) for 3hrs, or NaCl (additional 200 mM) or bosutinib plus NaCl for 3 (left panel) or 24 hrs (right panel). Cell lysates were subjected to Western blotting with the indicated antibodies.

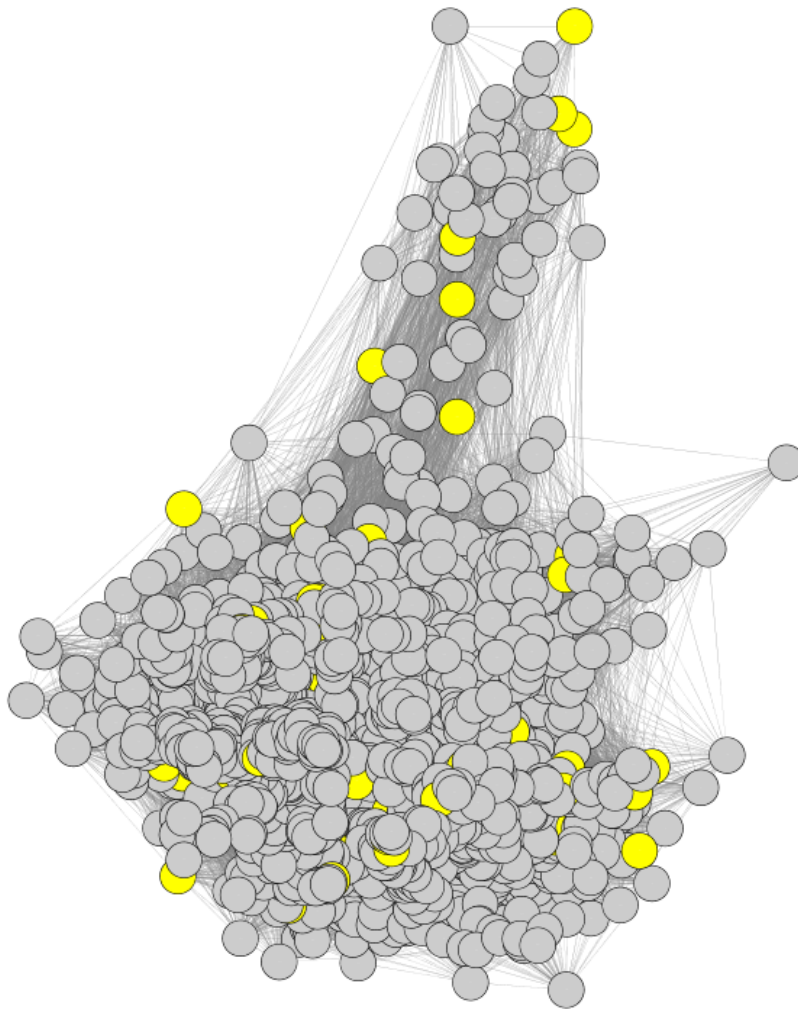

#### Hub genes

| Gene     | Degree |
|----------|--------|
| GBP1     | 689    |
| KIAA1244 | 659    |
| FAM26F   | 617    |
| COLEC12  | 596    |
| GBP4     | 582    |
| MYO1G    | 554    |
| TYMP     | 546    |
| GCH1     | 528    |
| SNX10    | 514    |
| CNIH4    | 508    |
| STAT1    | 498    |
| MCOLN1   | 491    |
| NISCH    | 486    |

#### Hub TF

| Gene    | Degree |
|---------|--------|
| STAT1   | 498    |
| MXD4    | 456    |
| TSC22D1 | 427    |
| ZNF814  | 413    |
| BNC2    | 413    |
| ZNF331  | 383    |
| IRF1    | 373    |
| ZNF440  | 347    |
| HES2    | 345    |
| ZBTB8A  | 325    |
| BATF2   | 319    |
| MAX     | 319    |
| NFIX    | 305    |

Supplementary Fig. 6. Macrophage activation network. The network was inferred by ARACNe (Margolin et al. 2006). The top 10% central hub gene network was visualized by Cytoscape (Shannon et al. 2003). Yellow marked nodes are transcription factors (regulators). Top 10 central hubs and top 10 central TF hubs are listed.



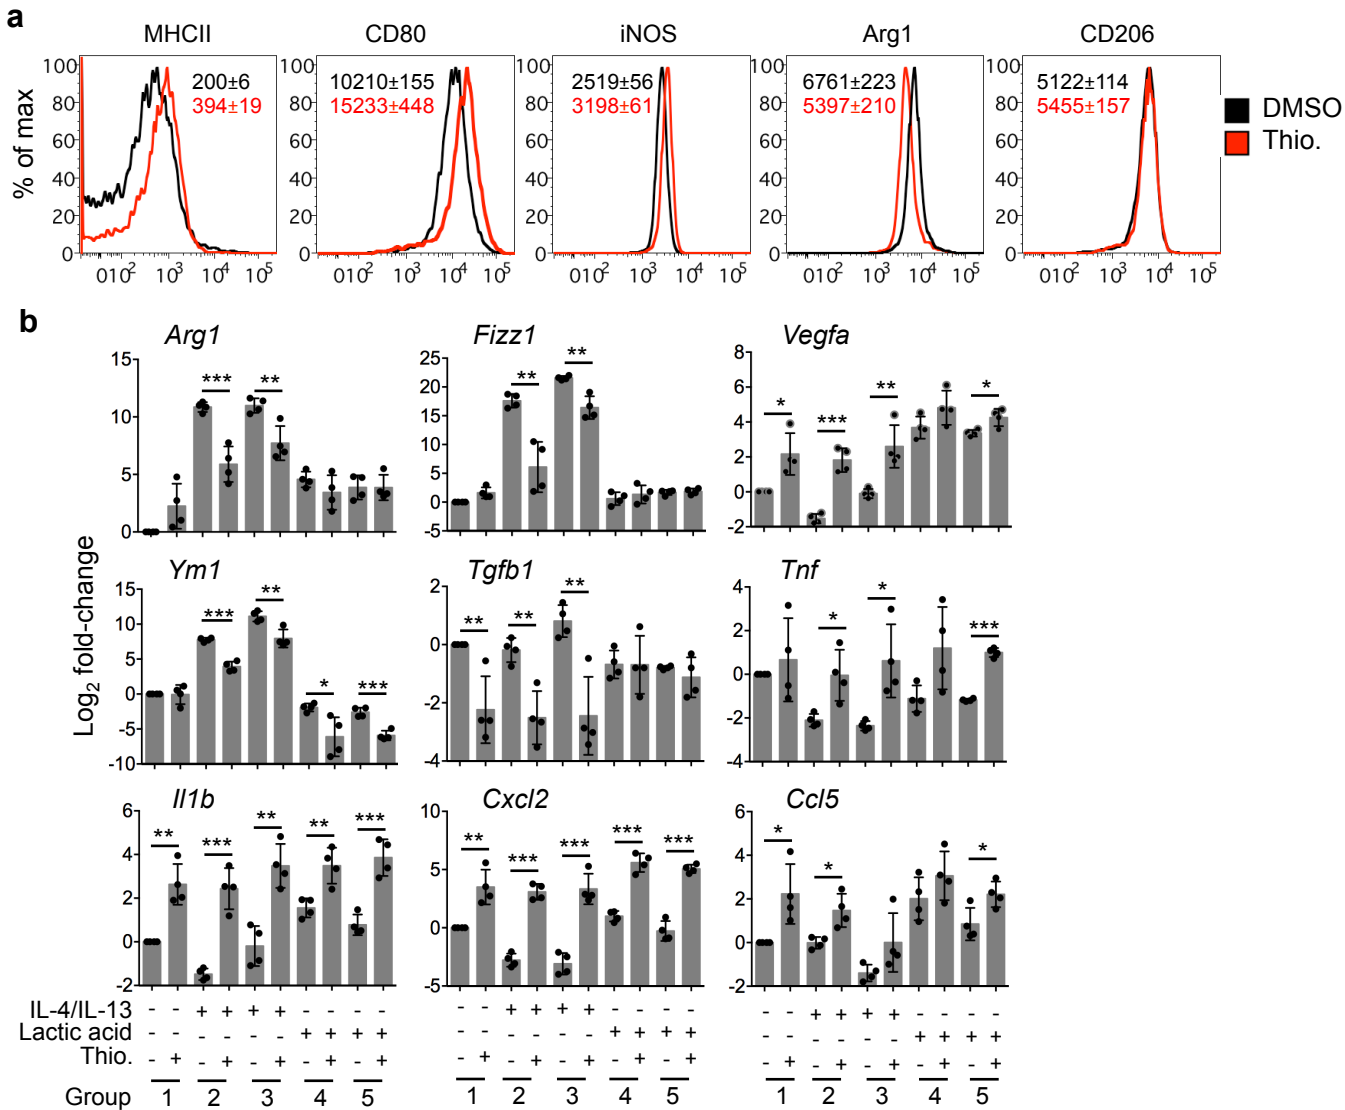

Supplementary Fig. 7. Thiostrepton inhibits the development and function of M2-like macrophages *in vitro*. **a**, Mouse BMMs were cultured with B16F10 tumor cell conditioned medium (CM) for 24 hrs first and then treated with 2.5  $\mu$ M thiostrepton for another 24 hrs (group 3 from Fig. 5d). Expression of MHCII, CD80, iNOS, Arg1 and CD206 were quantified by flow cytometry. Shown are representative staining profiles of treated (red) and untreated (black) TAMs from two independent experiments. **b**, Mouse BMMs were not treated or treated with 2.5  $\mu$ M thiostrepton for 24 hrs in normal medium (group 1), or polarized with IL-4/IL-13 in the absence or presence of 2.5  $\mu$ M thiostrepton for 24 hrs (group 2), or polarized with lactic acid in the absence or presence of 2.5  $\mu$ M thiostrepton for 24 hrs (group 4). Alternatively, mouse BMMs were polarized with IL-4/IL-13 (group 3) or lactic acid (group 5) for 24 hrs first and then either not treated or treated with 2.5  $\mu$ M thiostrepton for another 24 hrs. The transcript levels of the indicated genes were quantified by qPCR. Data are presented as mean  $\pm$  sd from 4 independent samples per group in two independent experiments. \*  $P < 0.05$ , \*\*  $P < 0.01$  and \*\*\*  $P < 0.001$  by two-sided T-test between untreated and treated groups.

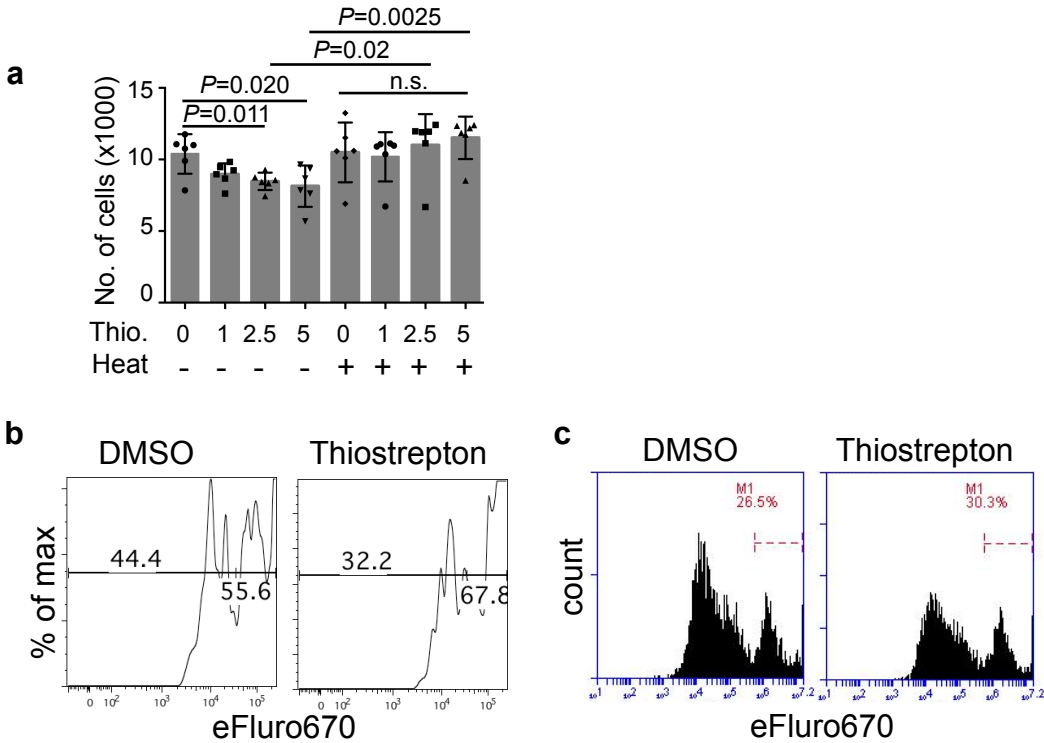

Supplementary Fig. 8. Thioestrepton activates macrophages in vitro. **a**, Mouse BMMs were treated with thioestrepton for 24 hrs (same as Fig. 5e). Conditioned medium (CM) was collected and filtered. B16F10 melanoma cells were cultured for 12 hrs with CM or CM that was heat-inactivated at 95°C for 5 min. The number of tumor cells were quantified by flow cytometry. Data are presented as mean  $\pm$  sd from two independent experiments. *P*-values are indicated by two-sided T-test. n.s.: not significant. **b-c**, Thioestrepton enhances ADCP of macrophages. Mouse BMMs (**b**) or hMDM (**c**) were treated with 2.5  $\mu$ M thioestrepton for 24 hrs, then co-cultured with equal number of eFluro670 and anti-CD20 labelled human B-cell lymphoma cells for 2 hrs, and analyzed by flow cytometry. Macrophages that have phagocytosed tumor cells are identified as efluro670<sup>+</sup> and CD14<sup>+</sup>. Shown are representative eFluro670 histograms gating on CD14<sup>+</sup> macrophages from three different experiments.

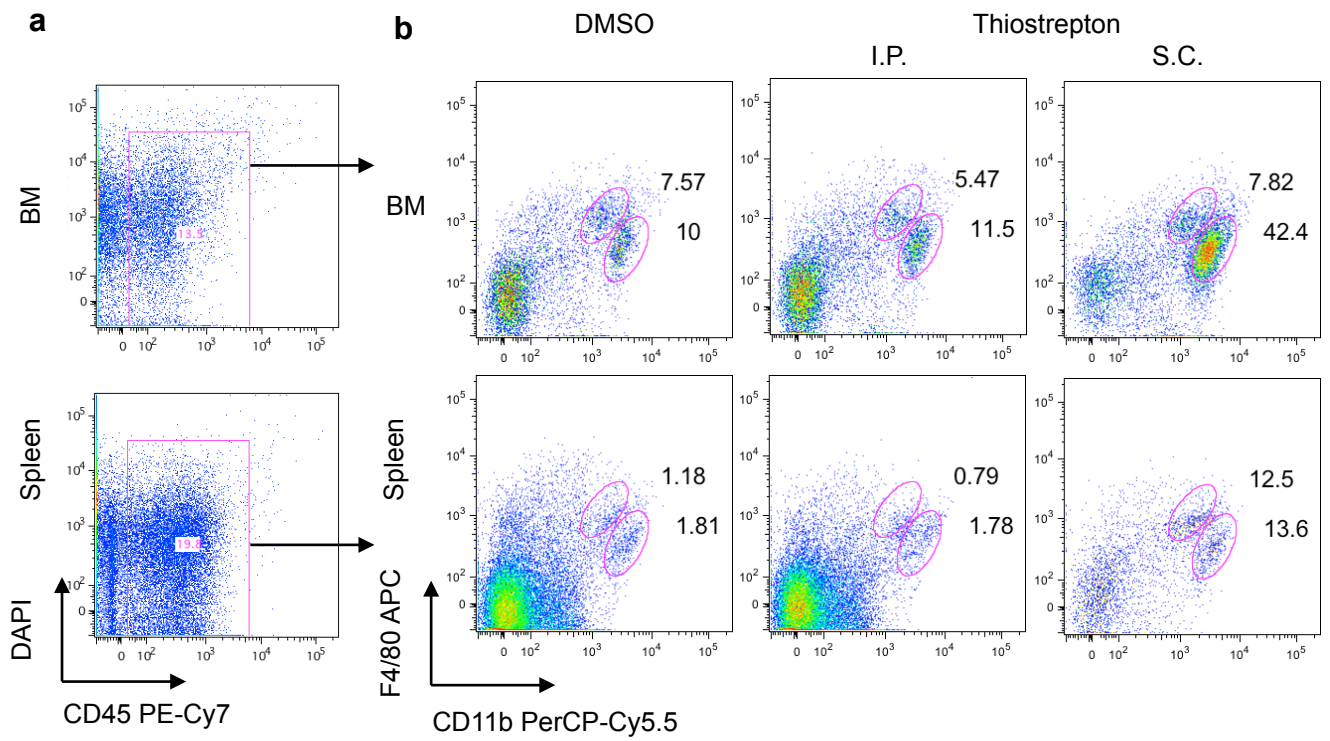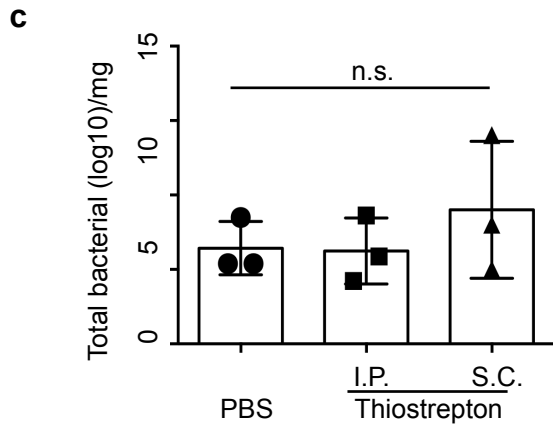

Supplementary Fig. 9. Thiostrepton activates macrophages *in vivo* without altering the total number of gut bacterial counts. **a**, Gating strategy of CD45<sup>+</sup> live immune cells in bone marrow (BM) and spleen. **b**, Flow cytometry analysis of macrophages (F4/80<sup>+</sup>CD11b<sup>+</sup>) and monocytes (F4/80<sup>-</sup>CD11b<sup>+</sup>) in the bone marrow and spleen of 8-10 weeks old normal B6 mice 6 days post treatment with either DMSO or thiostrepton by I.P. or S.C. (n=3). Shown are representative F4/80 versus CD11b staining profiles gating on CD45<sup>+</sup> cells from one mouse per group. I.P.: intraperitoneal injection; S.C.: paratumor subcutaneous injection. **c**, Total bacterial counts in the stool sample of mice (n=3). Data shown are mean  $\pm$  sd. n.s., not significant by two-sided T-test.

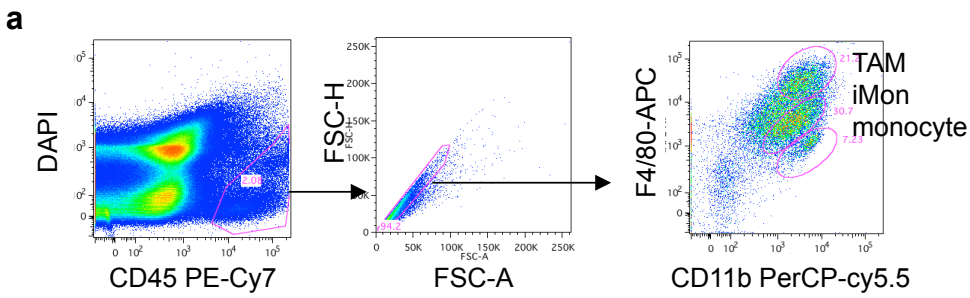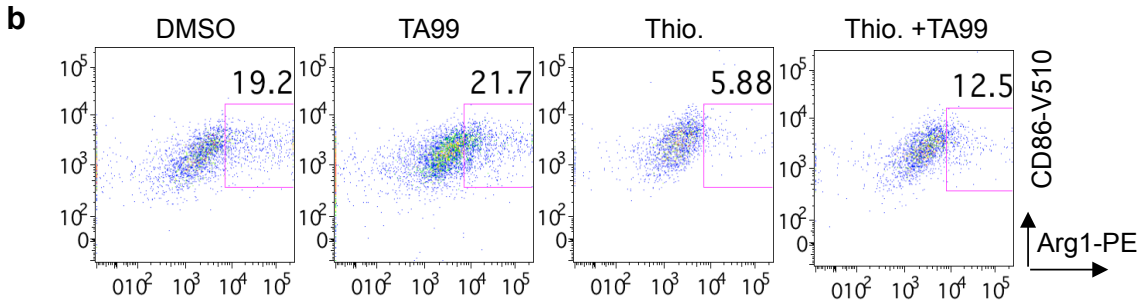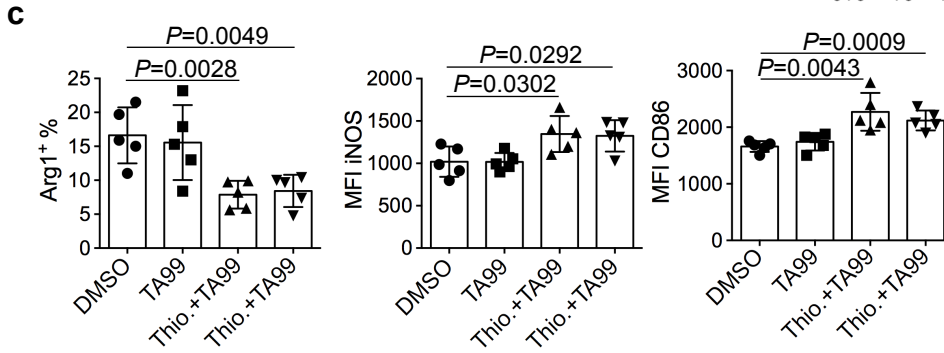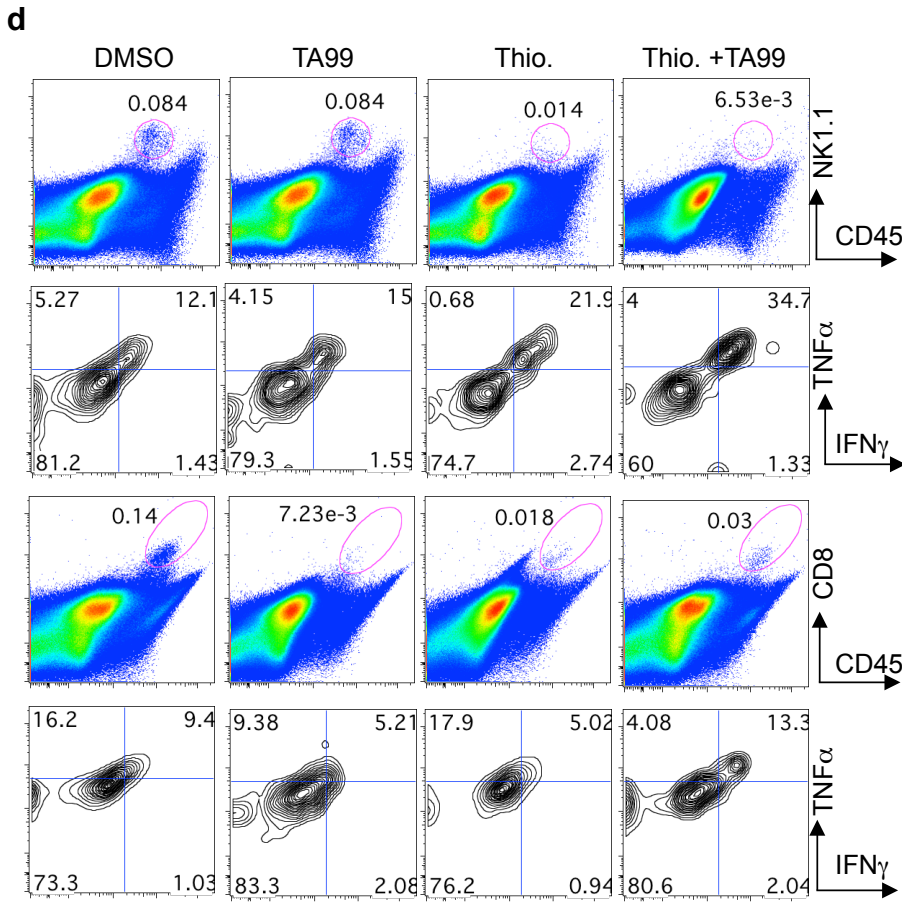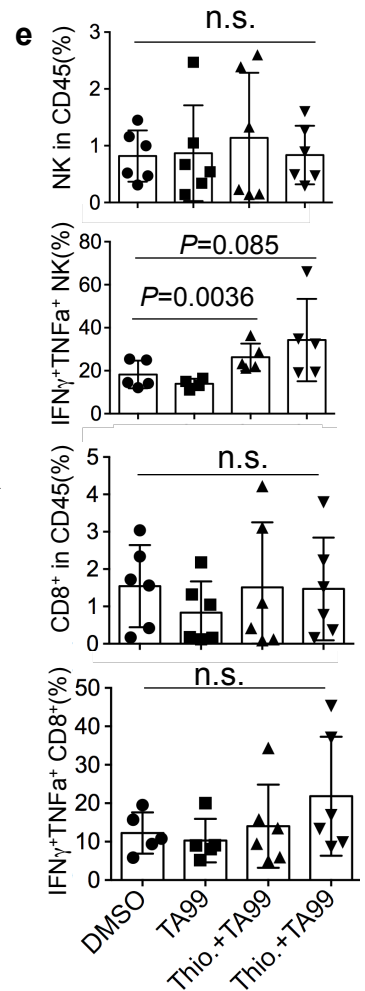

Supplementary Fig. 10. Effect of thiostrepton on macrophages, NK cells and CD8<sup>+</sup> T cells *in vivo*. B6 mice bearing subcutaneous B16F10 tumor were treated as in Figure 6. Single cell suspensions were prepared from tumors 18 day after engraftment, stained and analyzed by flow cytometry. **a**, gating strategy for flow analysis for TAM, inflammatory monocyte (iMon) and monocyte for Fig. 6c. **b-c** Representative intracellular staining profiles of Arg1 vs. CD86 gated on F4/80<sup>+</sup>CD11b<sup>+</sup> TAMs (**b**) and summarized data (mean ± sd) from n=5 mice per group from two independent experiments in Fig. 6a (**b**). **c** Representative intracellular staining profiles of IFN $\gamma$  vs. TNF $\alpha$  gated on CD45<sup>+</sup>NK1.1<sup>+</sup> NK cells (top two rows) and CD45<sup>+</sup>CD8 $\alpha$ <sup>+</sup> T cells (bottom two rows). Samples for T-cell staining were stimulated *in vitro* by T-cell stimulation cocktail for 4 hrs. **d**, summarized data from n=4-6 mice per group from two independent experiments in Fig. 6a. Data shown are mean ± sd. *P* values are based on two-sided T-test and indicated. n.s., not significant.

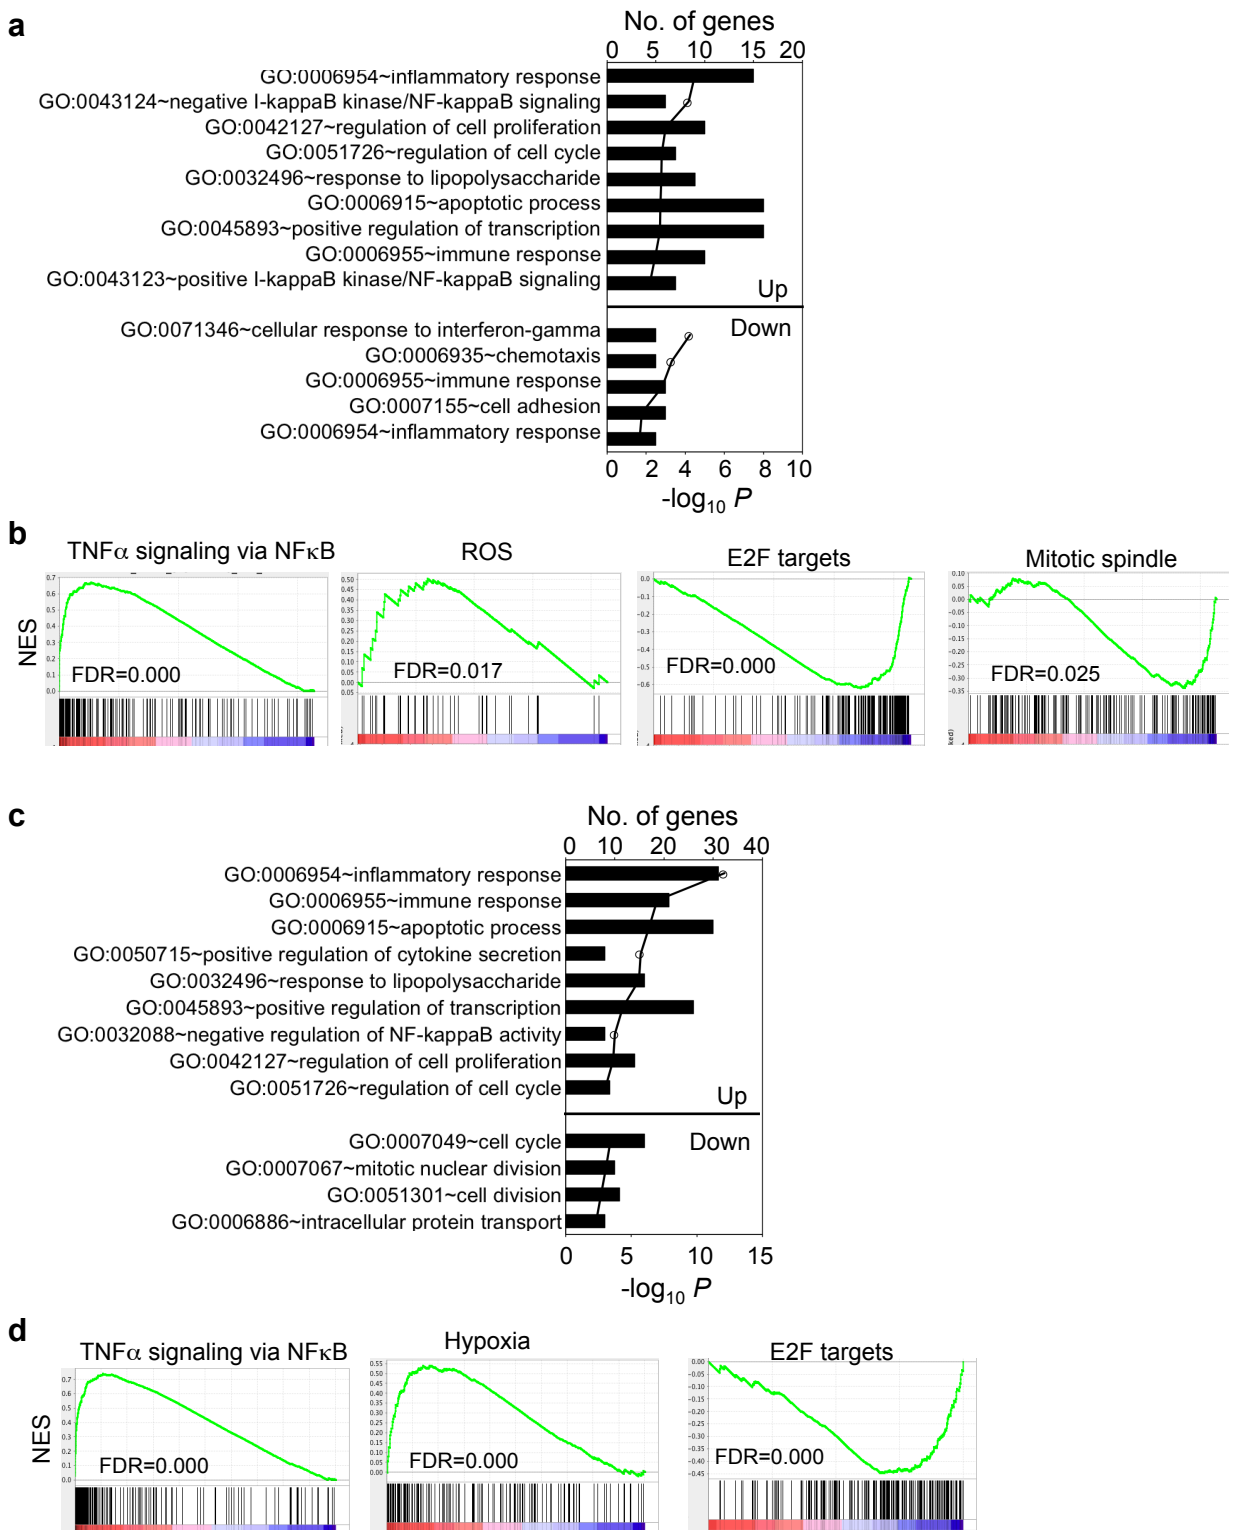

Supplementary Fig. 11. Transcriptional responses of TAMs to thiostrepton *in vivo*. **a**, GO enrichment analysis showing enrichment of certain pathways in the up-regulated and down-regulated genes in TAMs following I.P. administration of thiostrepton or DMSO. GO sets of biological process, number of genes and P-value are shown. Tumor infiltrated macrophages were sorted from tumor tissues based on CD45<sup>+</sup>F4/80<sup>+</sup>CD11b<sup>+</sup>Gr1<sup>-</sup> 18 days after tumor engraftment. Gene expression levels were measured by RNA-seq. **b**, GSEA showing enriched gene sets in TAMs induced by thiostrepton *in vivo* by I.P. administration (FDR q-value <0.05). **c**, GO enrichment analysis showing enrichment of certain pathways in the up-regulated and down-regulated genes in TAMs induced by S.C. administration of thiostrepton or DMSO. GO sets of biological process, number of genes and P-value are shown. **d**, GSEA showing enriched gene sets in TAMs induced by thiostrepton *in vivo* by S.C. administration (FDR q-value <0.05). I.P.: intraperitoneal injection; S.C.: paratumor subcutaneous injection.

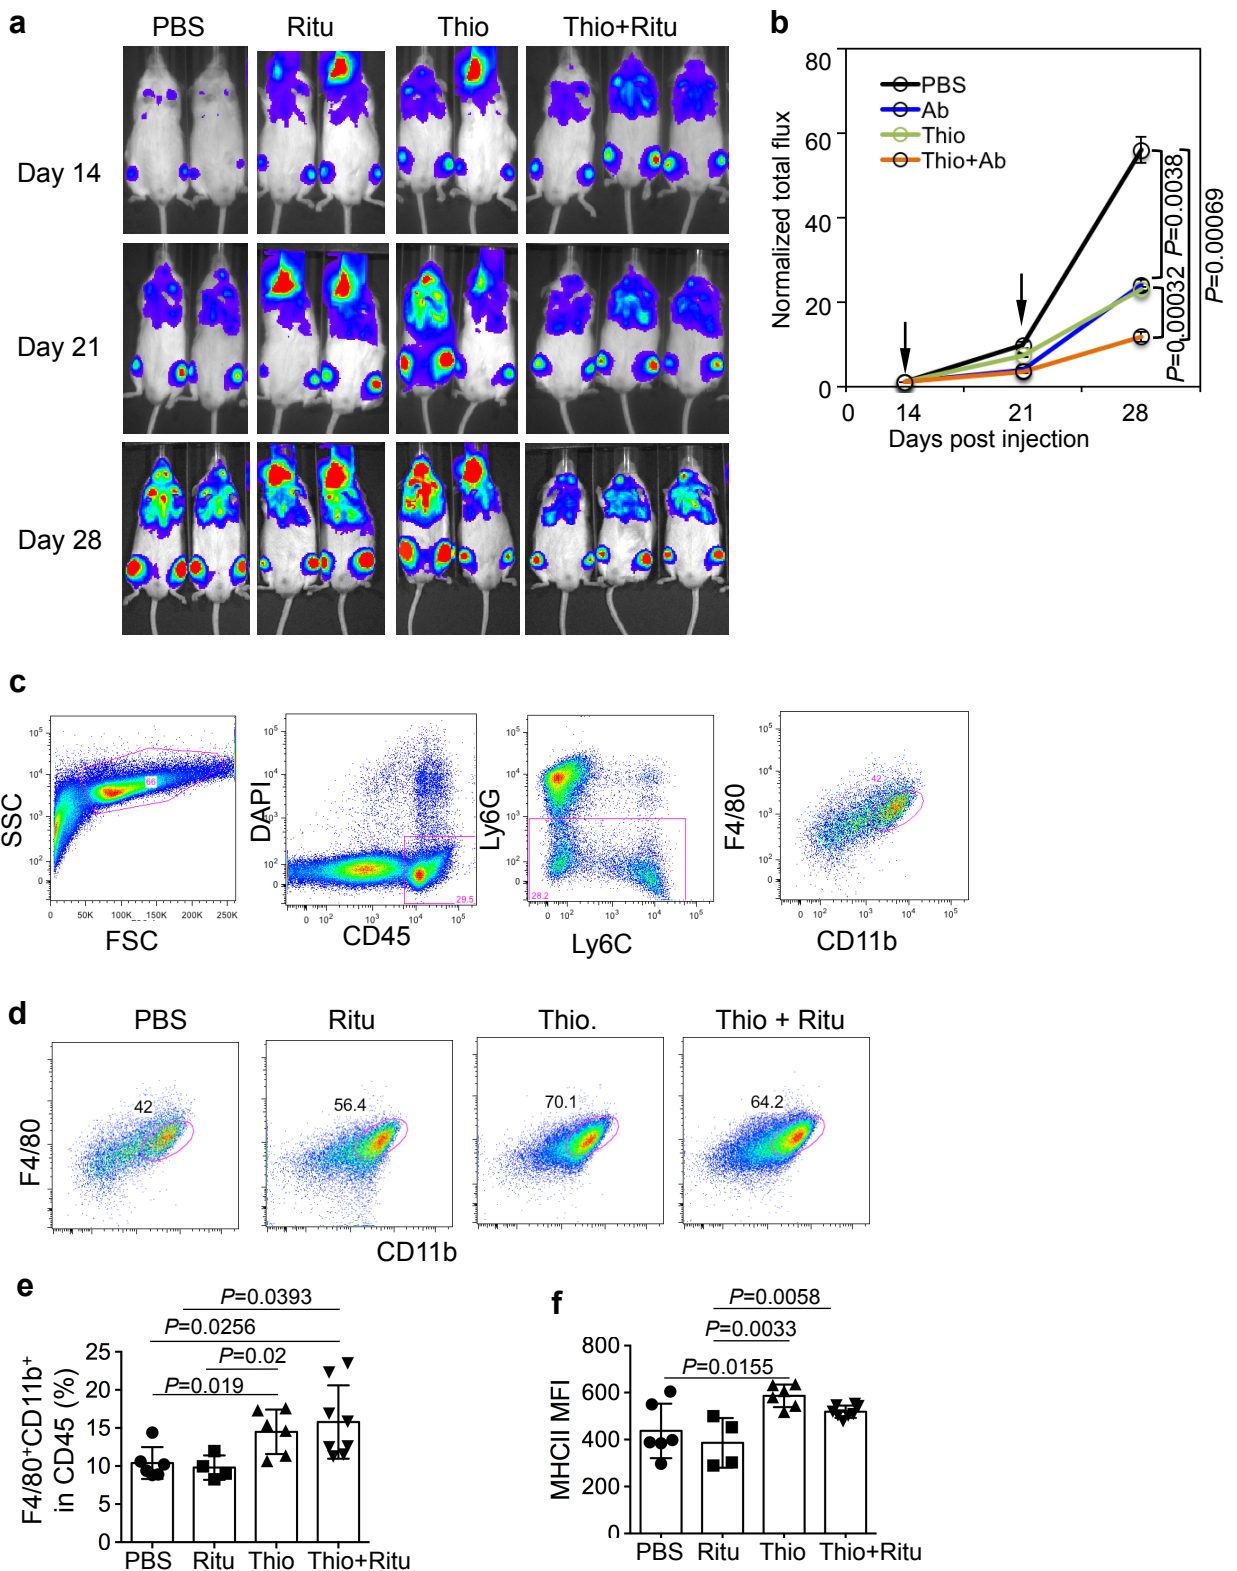

Supplementary Fig. 12. ThioStrepton inhibits tumor growth in the bone marrow. NSG mice were grafted with  $1 \times 10^7$  GMB-luc cells and dosed twice at 14 and 21 days later with 0.5 mg/kg Rituximab (Ritu) and/or 300 mg/kg thioStrepton (Thio). Tumor burden was monitored (a) and quantified (b) by bioluminescence imaging ( $n=5-6$  mice per group). Data are presented as mean  $\pm$  sem.  $P$  values are indicated by two-sided T-test. At day 28 post tumor engraftment, bone marrow cells were analyzed by flow cytometry (c-f). Shown are representative gating strategy (c) and F4/80 versus CD11b staining profiles gating on CD45<sup>+</sup> cells (d) and summarized data (mean  $\pm$  sd) (e) from  $n=4-6$  mice per group in two independent experiments. f, MHCII expression gating on macrophages. Data are presented as mean  $\pm$  sd from all mice from e.  $P$  values are indicated by two-sided T-test.

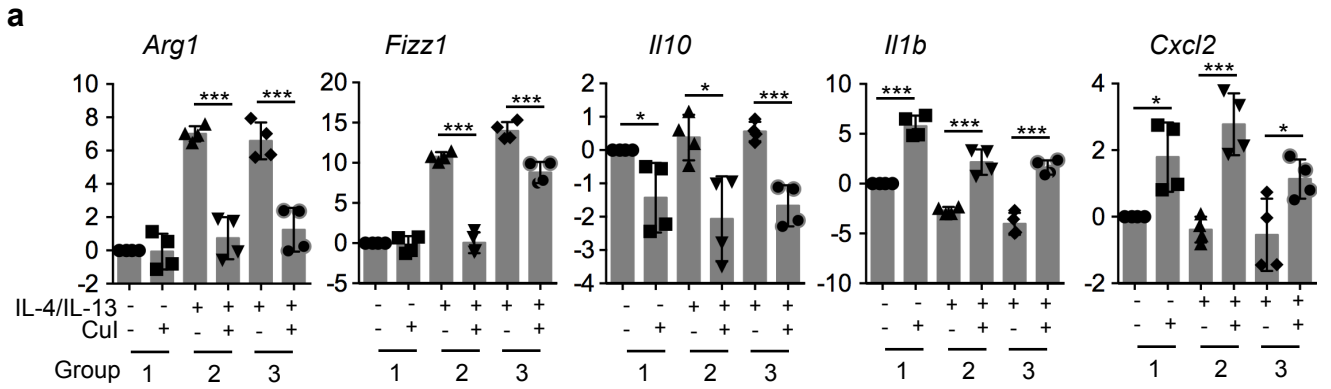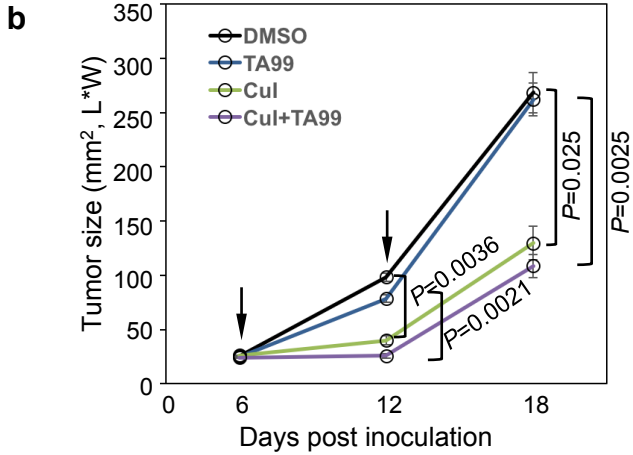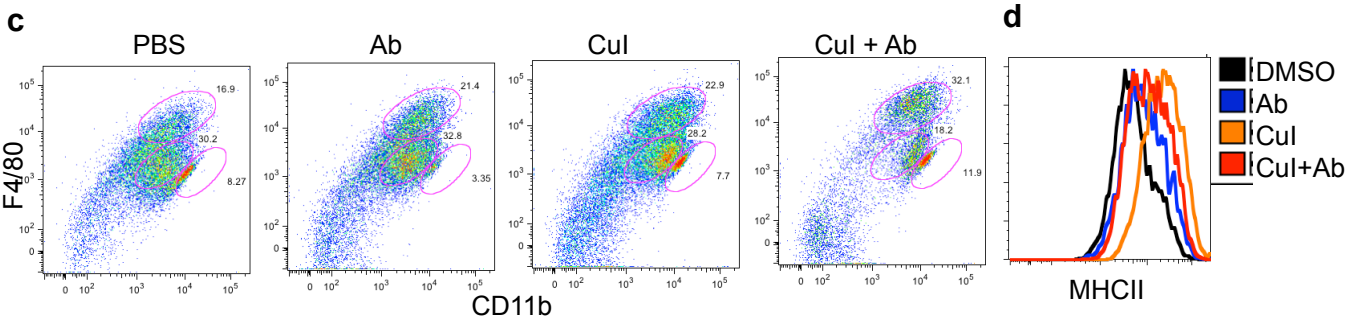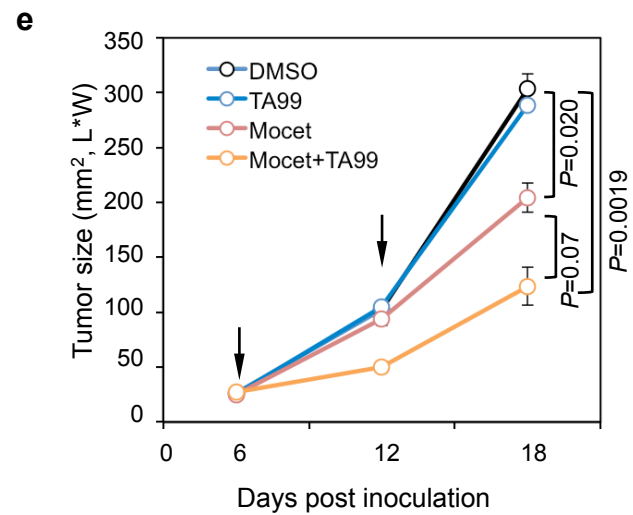



Supplementary Fig. 13. M1-activating compound, cucurbitacin I, also activates macrophages and inhibits tumor growth. **a**, Cucurbitacin I (Cul) inhibits the development and function of tumor-associated macrophages *in vitro* induced by IL-4/IL-13. Mouse BMMs were not treated or treated with 2.5  $\mu$ M cucurbitacin I for 24 hours in normal medium (group 1) or in the presence of IL-4/IL-13 (group 2), or mouse BMMs were polarized with IL-4/IL-13 for 24 hours and then either not treated or treated with 2.5  $\mu$ M Cul for 24 hours (group 3). RNA was isolated and the transcript levels of the indicated genes were quantified by PCR. Data are presented as mean  $\pm$  sd from 4 independent samples per group in two independent experiments. \*  $P < 0.05$ , \*\*  $P < 0.01$  and \*\*\*  $P < 0.001$  by two-sided T-test between untreated and treated group. **b**, B16F10 tumor growth in B6 mice treated I.P. with DMSO, TA99, Cul (1 mg/kg) and Cul plus TA99 (n=7-9 mice per group). Data are shown as mean  $\pm$  sem.  $P$  values are based on two-sided T-test and indicated. Arrows show the dosing time. **c-d**, Flow cytometry analysis of TAM (F4/80<sup>+</sup>CD11b<sup>+</sup>Ly6C<sup>-</sup>Ly6G<sup>-</sup>), inflammatory monocytes (F4/80<sup>int</sup>CD11b<sup>+</sup>Ly6C<sup>+</sup>Ly6G<sup>-</sup>) and monocytes (F4/80<sup>-</sup>CD11b<sup>+</sup>Ly6C<sup>+</sup>Ly6G<sup>+</sup>) in the tumors of mice treated with DMSO, TA99, Cul, and Cul plus TA99 18 days after tumor engraftment. Shown are representative F4/80 versus CD11b staining profiles gating on CD45<sup>+</sup> cells and MHCII histograms gating on macrophages from **c**. Gating strategy is the same as shown in Supplementary Fig. 10a. **e**, M1-activating compound, mocetinostat inhibits tumor growth. B16F10 tumor growth in B6 mice treated I.P. with DMSO, TA99, mocetinostat (Mocet)(1 mg/kg) and Mocet plus TA99 (n=5 mice per group). Data are shown as mean  $\pm$  sem.  $P$  values are based on two-sided T-test and indicated. Arrows show the dosing time.

**Supplementary Table 1****Dosage information of selected compounds on M0 macrophages**

| Compound       | EC         | R square | Max absolute | Category |
|----------------|------------|----------|--------------|----------|
| Taxol          | 0.10459189 | 0.416    | -6.68139     | M1       |
| Cucurbitacin   | 0.34174063 | 0.6048   | -4.808       | M1       |
| Chlorhexidine  | 1.62736296 | 0.7308   | -13.45       | M1       |
| Fenbendazole   | 0.4703644  | 0.8408   | -12.37       | M1       |
| Thiostrepton   | 3.93691593 | 0.542    | -12.75       | M1       |
| Diphenylene    | 0.67677365 | 0.4593   | -8.509       | M1       |
| LE135          | 0.41887689 | 0.5289   | -8.912       | M1       |
| Fluvoxamine    | 10.6420447 | 0.8318   | -7.38        | M1       |
| Niclosamide    | 0.79658547 | 0.8077   | -8.929       | M1       |
| MS275          | 1.04687704 | 0.5386   | -7.993       | M1       |
| Mocetinostat   | 0.45359214 | 0.7105   | -15.14       | M1       |
| Pimozide       | 1.17941118 | 0.2042   | -8.006       | M1       |
| NP-010176      | 4.03386043 | 0.5479   | -8.156       | M1       |
| HMN214         | 0.10382862 | 0.6514   | -12.51       | M1       |
| Celastrol      | 0.79618903 | 0.4416   | -4.485       | M1       |
| Cantharidin    | 0.17983226 | 0.2334   | -31.36       | M1       |
| NVP 231        | 2.24851869 | 0.8661   | -22.37       | M1       |
| FTY720         | 2.94456442 | 0.8244   | -11.58       | M1       |
| Evodiamine     | 0.3969275  | 0.9413   | -26.36       | M1       |
| Penfluridol    | 2.52355815 | 0.8439   | -4.873       | M1       |
| Bostunib       | 0.09135798 | 0.3168   | 23.5         | M2       |
| Su11274        | 0.72193028 | 0.9476   | 17.8         | M2       |
| Alsterpaullone | 0.3076402  | 0.4391   | 13.9         | M2       |
| ALRESTAT       | 3.66821661 | 0.8352   | 15.05        | M2       |

**Supplementary Table 2****Dosage information of selected compounds on differentiated macrophages**

| Compounds           | EC          | R-square | Category |
|---------------------|-------------|----------|----------|
| Bisantrene dihydroc | 1.984795322 | 0.737    | M2       |
| triptolide          | 0.061894009 | 0.2428   | M2       |
| lovastatin          | 0.442115573 | 0.3319   | M2       |
| QS 11               | 0.261082221 | 0.7666   | M2       |
| Regorafenib         | 2.882594235 | 0.7596   | M2       |
| Sorafenib           | 0.794071491 | 0.7332   | M2       |
| MLN2238             | 3.461032864 | 0.3362   | M2       |
| GW-843682X          | 0.897347267 | 0.5783   | M2       |
| KW 2449             | 2.16025641  | 0.8979   | M2       |
| Axitinib            | 0.591495199 | 0.9957   | M2       |
| JTE 013             | 0.938113208 | 0.6378   | M2       |
| Purmorphamine       | 2.345142857 | 0.8143   | M2       |
| Arcyriaflavin A     | 1.342190889 | 0.6374   | M2       |
| Dasatinib           | 0.761950413 | 0.6968   | M2       |
| NVP-LDE225          | 2.76599809  | 0.6752   | M2       |
| 1-Naphthyl PP1      | 2.072231834 | 0.8623   | M2       |
| SELAMECTIN          | 15          | 0        | M2       |
| MGCD-265            | 0.911173577 | 0.8933   | M2       |
| Bosutinib           | 0.164371173 | 0.523    | M2       |
| Cantharidin         | 0.158610234 | 0.9764   | M1       |
| Cucurbitacin I      | 1.759105431 | 0.53     | M1       |
| Alprostadi          | 0.056193353 | 0.1288   | M1       |
| HMN-214             | 1.482432432 | 0.3942   | M1       |
| WP1130              | 15          | 0.05     | M1       |
| MS275               | 0.81097561  | 0.181    | M1       |
| SMER 3              | 0.093980962 | 0.4302   | M1       |
| SCH 79797 dihydro   | 0.219379028 | 0.7105   | M1       |
| NVP 231             | 5.744680851 | 0.4822   | M1       |
| Prulifloxacin       | 15          | 0        | M1       |
| FTY720              | 0.131265421 | 0.262    | M1       |
| DIHYDROCELASTF      | 15          | 0.03     | M1       |
| Diphenyleneiodonit  | 0.336300175 | 0.2451   | M1       |
| Penfluridol         | 0.169426434 | 0.7956   | M1       |
| thiostrepton        | 0.407871889 | 0.3882   | M1       |
| Evodiamine          | 0.679884726 | 0.949    | M1       |
| MITOXANTRONE H      | 0.559348161 | 0.5764   | M1       |
| Quinolinium         | 8.365292011 | 0.1839   | M1       |
| Fenbendazole        | 0.649293564 | 0.7447   | M1       |
| Niclosamide         | 1.12595217  | 0.3178   | M1       |
| Taxol               | 0.128848    | 0.1359   | M1       |

### Supplementary Table 3. qPCR primers

| mouse Primer | Sequence                |
|--------------|-------------------------|
| Arg1-F       | CATTGGCTTGCGAGACGTAGAC  |
| Arg1-R       | GCTGAAGGTCTCTTCCATCACC  |
| Fizz1-F      | CAAGGAACTTCTTGCCAATCCAG |
| Fizz1-R      | CCAAGATCCACAGGCAAAGCCA  |
| Vegfa-F      | CTGCTGTAACGATGAAGCCCTG  |
| Vegfa-R      | GCTGTAGGAAGCTCATCTCTCC  |
| Ym1-F        | TACTCACTTCCACAGGAGCAGG  |
| Ym1-R        | CTCCAGTGTAGCCATCCTTAGG  |
| Tgfb-F       | TGATACGCCTGAGTGGCTGTCT  |
| Tgfb-R       | CACAAGAGCAGTGAGCGCTGAA  |
| Tnf-F        | GGTGCCTATGTCTCAGCCTCTT  |
| Tnf-R        | GCCATAGAACTGATGAGAGGGAG |
| Il1b-F       | ACGGCTGAGTTTCAGTGAGACC  |
| Il1b-R       | CACTCTGGTAGGTGTAAGGTGC  |
| Ccl2-F       | GCTACAAGAGGATCACCAGCAG  |
| Ccl2-R       | GTCTGGACCCATTCTTCTTGG   |
| Ccl5-F       | CCTGCTGCTTTGCCTACCTCTC  |
| Ccl5-R       | ACACACTTGGCGGTTCTTCGA   |
| Cxcl2-F      | CATCCAGAGCTTGAGTGTGACG  |
| Cxcl2-R      | GGCTTCAGGGTCAAGGCAAACCT |
| Gapdh-F      | AGTATGACTCCACTCACGGC    |
| Gapdh-R      | GTTACACCCATCACAAACA     |
| Nos2_F       | GAGACAGGGAAGTCTGAAGCAC  |
| Nos2_w       | CCAGCAGTAGTTGCTCCTCTTC  |

| human Primer | Sequence                |
|--------------|-------------------------|
| GAPDH-F      | GTCTCCTCTGACTTCAACAGCG  |
| GAPDH-R      | ACCACCCTGTTGCTGTAGCCAA  |
| TNF-F        | CTCTTCTGCCTGCTGCACTTTG  |
| TNF-R        | ATGGGCTACAGGCTTGTCACTC  |
| IL1B-F       | CCACAGACCTTCCAGGAGAATG  |
| IL1B-R       | GTGCAGTTCAGTGATCGTACAGG |
| CXCL2-F      | GGCAGAAAGCTTGTCTCAACCC  |
| CXCL2-R      | CTCCTTCAGGAACAGCCACCAA  |
| IL10-F       | TCTCCGAGATGCCTTCAGCAGA  |
| IL10-R       | TCAGACAAGGCTTGGCAACCCA  |
| CD86-F       | TCATTCCCTGATGTTACGAGC   |
| CD86-R       | TCTTCCCTCTCCATTGTGTTG   |
| CD163-F      | GTGTGATGACTCTTGGGACTTG  |
| CD163-R      | AGGATGACTGACGGGATGAG    |
| CD206-F      | GACTGATAAGTGGAGGGTGAGG  |
| CD206-R      | CCAGAGAGGAACCCATTCCG    |
